# Supplementary material for: Local, nonlinear effects of cGMP and Ca2+ reduce single photon response variability in retinal rods
Source: PubMed Central journal article supplement (PMC6894879; doi:10.1371/journal.pone.0225948), 2019-12-05
Supplement: pone.0225948.s001.pdf [file pone.0225948.s001.pdf]

# APPENDICES to Local, Nonlinear Effects of cGMP and Ca<sup>2+</sup> Reduce Single Photon Response Variability in Retinal Rods

Giovanni Caruso  
CNR, Ist. Tecnologie Applicate ai Beni Culturali  
Via Salaria Km. 29,300- C.P. 10 Monterotondo St., Roma, Italy  
email: [giovanni.caruso@itabc.cnr.it](mailto:giovanni.caruso@itabc.cnr.it)

Vsevolod V. Gurevich  
Department of Pharmacology, Vanderbilt Univ. Medical Center  
2200 Pierce Avenue, Preston Res. Building, Rm 452  
Nashville, TN 37232  
email: [Vsevolod.Gurevich@vanderbilt.edu](mailto:Vsevolod.Gurevich@vanderbilt.edu)

Colin Klaus  
The Mathematical Biosciences Institute, The Ohio State University  
1735 Neil Avenue, Columbus, OH 43210  
email: [klaus.68@mbi.osu.edu](mailto:klaus.68@mbi.osu.edu)

Heidi E. Hamm  
Department of Pharmacology, Vanderbilt Univ. Medical Center  
2200 Pierce Avenue, Preston Res. Building, Rm 452  
Nashville, TN 37232  
email: [heidi.hamm@vanderbilt.edu](mailto:heidi.hamm@vanderbilt.edu)

Clint L. Makino\*  
Boston University School of Medicine  
Department of Physiology and Biophysics  
Ctr. for Advanced Biomedical Research, W402  
700 Albany Street, Boston, MA 02118-2526  
email: [cmakino@bu.edu](mailto:cmakino@bu.edu)

Emmanuele DiBenedetto†  
Department of Mathematics, Vanderbilt University  
1326 Stevenson Center, Nashville, TN 37240  
email: [em.diben@vanderbilt.edu](mailto:em.diben@vanderbilt.edu)

---

\*Co-corresponding author

†Corresponding author

# A Appendix. Dynamics of the Cascade

## A.1 Symbolism

- $H$  = height of the ROS
- $R$  = radius of the discs inside the ROS (disregarding incisures)
- $D_R$  = disc of radius  $R$  centered at the origin of  $\mathbb{R}^2$
- $m$  = number of incisures
- $\mathcal{V}_j$  = limiting  $j^{\text{th}}$  incisures, assimilated to segments of length  $R - r_{o,j}$
- $r_j$  = radial variable on  $\mathcal{V}_j$  with origin at  $r_{o,j}$
- $\theta_{\varepsilon_o,j}(r_j)$  = geometry of the  $j^{\text{th}}$  incisure with tip at  $r_{o,j}$
- $D_{\text{eff}} = D_R - \cup_{j=1}^m \mathcal{V}_j$  effective domain of the activation cascade
- $k$  = number of distinct activated discs each by a single photon
- $D_{i,\text{eff}}^*$  =  $i$ th activated disc
- $\Omega = D_R \times (0, H)$  limiting cylinder enclosing the stack of discs  $D_R$
- $\Omega_{\text{eff}} = D_{\text{eff}} \times (0, H)$  limiting domain available for diffusion of cGMP and  $\text{Ca}^{2+}$
- $\mathcal{B}_j = \mathcal{V}_j \times (0, H)$  limiting vertical rectangles cut on the limiting ROS  
by the limiting incisures aligned in series
- $S$  = limiting outer shell (same as lateral boundary of  $\Omega$ )
- $dS$  = surface measure on  $S$
- $\varepsilon_o$  = width of each disc
- $\nu\varepsilon_o$  = width of each interdiscal space
- $\sigma\varepsilon_o$  = width of the outer shell
- $1 - \mu_o$  = volume ratio of cytosol to the volume of the ROS
- $[\text{cGMP}]$  =  $[\text{cGMP}]$  in the interior of the limiting ROS
- $[\text{cGMP}]_*$  =  $[\text{cGMP}]$  at the activated disc(s)
- $[\text{cGMP}]_S$  =  $[\text{cGMP}]$  in the limiting outer shell
- $[\text{cGMP}]_{\mathcal{B}_j}$  =  $[\text{cGMP}]$  on  $\mathcal{B}_j$
- $[\text{Ca}^{2+}]$  =  $[\text{Ca}^{2+}]$  in the interior of the limiting ROS
- $[\text{Ca}^{2+}]_*$  =  $[\text{Ca}^{2+}]$  at the activated disc(s)
- $[\text{Ca}^{2+}]_S$  =  $[\text{Ca}^{2+}]$  in the limiting outer shell
- $[\text{Ca}^{2+}]_{\mathcal{B}_j}$  =  $[\text{Ca}^{2+}]$  on  $\mathcal{B}_j$
- $\nabla_S$  = gradient along the cylindrical variables of  $S$
- $\nabla_{\mathcal{B}_j}$  = gradient along the  $(r_j, z)$  variables of  $\mathcal{B}_j$
- $\nabla_{(x,y)}$  = gradient along the horizontal variables  $(x, y)$

## A.2 Weak Formulation of the Dynamics of cGMP

$$\begin{aligned}
& (1 - \mu_o) \left\{ \iint\!\!\!\int_{\Omega_{\text{eff}}} [\text{cGMP}](t)\varphi(t) dx dy dz - \iint\!\!\!\int_{\Omega_{\text{eff}}} [\text{cGMP}]_{\text{dark}}\varphi(0) dx dy dz \right. \\
& \quad + \int_0^t \iint\!\!\!\int_{\Omega_{\text{eff}}} \left\{ - [\text{cGMP}]\varphi_t + D_{\text{cG}} \nabla_{(x,y)} [\text{cGMP}] \cdot \nabla_{(x,y)} \varphi \right. \\
& \quad \quad \quad \left. \left. - [\alpha([\text{Ca}^{2+}]) - \beta_{\text{dark}}[\text{cGMP}]]\varphi \right\} dx dy dz d\tau \right\}_{\text{interior}} \\
& + \nu \varepsilon_o \left\{ \sum_{i=1}^k \iint_{D_{i,\text{eff}}^*} \{ [\text{cGMP}]_*(t)\varphi(t) - [\text{cGMP}]_{\text{dark}}\varphi(0) \} dx dy \right. \\
& \quad + \sum_{i=1}^k \int_0^t \iint_{D_{i,\text{eff}}^*} \left\{ - [\text{cGMP}]_*\varphi_t + D_{\text{cG}} \nabla_{(x,y)} [\text{cGMP}]_* \cdot \nabla_{(x,y)} \varphi \right. \\
& \quad \left. - \left( \alpha([\text{Ca}^{2+}]_*) - \beta_{\text{dark}}[\text{cGMP}]_* - \frac{k_{\sigma;\text{hyd}}^*}{\nu \varepsilon_o} [\text{E}^*]_{\sigma} [\text{cGMP}]_* \right) \varphi \right\} dx dy d\tau \right\}_{\text{activated discs}} \\
& + \sigma \varepsilon_o \left\{ \iint_S \{ [\text{cGMP}]_S(t)\varphi(t) - [\text{cGMP}]_{\text{dark}}\varphi(0) \} dS \right. \\
& \quad \left. + \int_0^t \iint_S \left\{ - [\text{cGMP}]_S\varphi_t + D_{\text{cG}} \nabla_S [\text{cGMP}]_S \cdot \nabla_S \varphi \right\} dS d\tau \right\}_{\text{outer shell}} \\
& + 2 \left\{ \sum_{j=1}^m \iint_{\mathcal{B}_j} r_j \theta_{j,\varepsilon_o}(r_j) \{ [\text{cGMP}]_{\mathcal{B}_j}(t)\varphi(t) dr_j dz - [\text{cGMP}]_{\text{dark}}\varphi(0) \} dr_j dz \right. \\
& \quad \left. + \sum_{j=1}^m \int_0^t \iint_{\mathcal{B}_j} r_j \theta_{j,\varepsilon_o}(r_j) \left\{ - [\text{cGMP}]_{\mathcal{B}_j}\varphi_t + D_{\text{cG}} \nabla_{\mathcal{B}_j} [\text{cGMP}]_{\mathcal{B}_j} \cdot \nabla_{\mathcal{B}_j} \varphi \right\} dr_j dz d\tau \right\}_{\text{incisures}} = 0
\end{aligned}$$

for all  $t > 0$  and all smooth, real valued functions  $\varphi$  in  $\bar{\Omega} \times \mathbb{R}^+$ . Here

$$\begin{aligned}
\alpha([\text{Ca}^{2+}]) &= \alpha_{\min} + (\alpha_{\max} - \alpha_{\min}) \frac{K_{\text{cyc}}^{\text{m}_{\text{cyc}}}}{K_{\text{cyc}}^{\text{m}_{\text{cyc}}} + [\text{Ca}^{2+}]^{\text{m}_{\text{cyc}}}} \\
\alpha([\text{Ca}^{2+}]_*) &= \alpha_{\min} + (\alpha_{\max} - \alpha_{\min}) \frac{K_{\text{cyc}}^{\text{m}_{\text{cyc}}}}{K_{\text{cyc}}^{\text{m}_{\text{cyc}}} + [\text{Ca}^{2+}]_*^{\text{m}_{\text{cyc}}}}
\end{aligned}
\quad \text{where} \quad
\begin{aligned}
\alpha_{\max} &= k_{\text{GC},\text{max}}[\text{GC}] \\
\alpha_{\min} &= k_{\text{GC},\text{min}}[\text{GC}].
\end{aligned}$$

Here  $k_{\text{GC},\text{min}}$  and  $k_{\text{GC},\text{max}}$  are the minimum and maximum catalytic rates of production of cGMP by guanylyl cyclase GC occurring respectively as  $[\text{Ca}^{2+}] \rightarrow \infty$  and as  $[\text{Ca}^{2+}] \rightarrow 0$ .

### A.3 Weak Formulation of the Dynamics of $\text{Ca}^{2+}$

$$\begin{aligned}
& (1 - \mu_o) \left\{ \iint\limits_{\Omega_{\text{eff}}} \{ [\text{Ca}^{2+}](t)\varphi(t) - [\text{Ca}^{2+}]_{\text{dark}}\varphi(0) \} dx dy dz \right. \\
& \quad \left. + \int_0^t \iint\limits_{\Omega_{\text{eff}}} \{ - [\text{Ca}^{2+}]\varphi_t + D_{\text{Ca}} \nabla_{(x,y)} [\text{Ca}^{2+}] \cdot \nabla_{(x,y)} \varphi \} dx dy dz d\tau \right\}_{\text{interior}} \\
& + \nu \varepsilon_o \left\{ \sum_{i=1}^k \iint_{D_{i,\text{eff}}^*} \{ [\text{Ca}^{2+}]_*(t)\varphi(t) - [\text{Ca}^{2+}]_{\text{dark}}\varphi(0) \} dx dy \right. \\
& \quad \left. + \sum_{i=1}^k \int_0^t \iint_{D_{i,\text{eff}}^*} \{ - [\text{Ca}^{2+}]_*\varphi_t + D_{\text{Ca}} \nabla_{(x,y)} [\text{Ca}^{2+}]_* \cdot \nabla_{(x,y)} \varphi \} dx dy d\tau \right\}_{\text{activated discs}} \\
& + \sigma \varepsilon_o \left\{ \iint_S \{ [\text{Ca}^{2+}]_S(t)\varphi(t) - [\text{Ca}^{2+}]_{\text{dark}}\varphi(0) \} dS \right. \\
& \quad + \int_0^t \iint_S \{ - [\text{Ca}^{2+}]_S\varphi_t + D_{\text{Ca}} \nabla_S [\text{Ca}^{2+}]_S \cdot \nabla_S \varphi \} dS d\tau \\
& \quad \left. + \int_0^t \iint_S \frac{1}{\sigma \varepsilon_o B_{\text{Ca}} \mathcal{F}} \left\{ \frac{j_{\text{ex}}^{\text{sat}}}{\Sigma_{\text{rod}}} \frac{[\text{Ca}^{2+}]_S}{K_{\text{ex}} + [\text{Ca}^{2+}]_S} \right. \right. \\
& \quad \quad \left. \left. - \frac{1}{2} f_{\text{Ca}} \frac{j_{\text{cG}}^{\text{max}}}{\Sigma_{\text{rod}}} \frac{[\text{cGMP}]_S^{\text{mCG}}}{K_{\text{cG}}^{\text{mCG}} + [\text{cGMP}]_S^{\text{mCG}}} \right\} \varphi dS d\tau \right\}_{\text{outer shell}} \\
& + 2 \left\{ \sum_{j=1}^m \iint_{\mathcal{B}_j} r_j \theta_{j,\varepsilon_o}(r_j) \{ [\text{Ca}^{2+}]_{\mathcal{B}_j}(t)\varphi(t) - [\text{Ca}^{2+}]_{\text{dark}}\varphi(0) \} dr_j dz \right. \\
& \quad \left. + \sum_{j=1}^m \int_0^t \iint_{\mathcal{B}_j} r_j \theta_{j,\varepsilon_o}(r_j) \{ - [\text{Ca}^{2+}]_{\mathcal{B}_j}\varphi_t + D_{\text{Ca}} \nabla_{\mathcal{B}_j} [\text{Ca}^{2+}]_{\mathcal{B}_j} \cdot \nabla_{\mathcal{B}_j} \varphi \} dr_j dz d\tau \right\}_{\text{incisures}} = 0
\end{aligned}$$

for all  $t > 0$  and all smooth, real valued functions  $\varphi$  in  $\bar{\Omega} \times \mathbb{R}^+$ .

### A.4 Weak Formulation of the Dynamics of Transducer and Effector

$$\begin{aligned}
& \iint_{D_{\text{eff}}} [\text{T}^*](t)\varphi(t) dx dy + \int_0^t \iint_{D_{\text{eff}}} \{ - [\text{T}^*]\varphi_t + D_T \nabla [\text{T}^*] \cdot \nabla \varphi \} dx dy d\tau \\
& \quad = \int_0^t k_\ell \varphi(x(\tau), y(\tau)\tau) d\tau - \int_0^t \iint_{D_{\text{eff}}} k_{\text{T}^*\text{E}}[\text{E}][\text{T}^*]\varphi dx dy d\tau \\
& \iint_{D_{\text{eff}}} [\text{E}^*](t)\varphi(t) dx dy + \int_0^t \iint_{D_{\text{eff}}} \{ - [\text{E}^*]\varphi_t + D_E \nabla [\text{E}^*] \cdot \nabla \varphi \} dx dy d\tau \\
& \quad = \int_0^t \iint_{D_{\text{eff}}} \{ k_{\text{T}^*\text{E}}[\text{E}][\text{T}^*]\varphi - k_{\text{E}^*}[\text{E}^*]\varphi \} dx dy d\tau
\end{aligned}$$

for all  $t > 0$  and all smooth, real valued functions  $\varphi$  in  $\bar{D}_R \times \mathbb{R}^+$ .

## B Appendix. Parameters

### B.1 Mouse Parameters

Table S1: Parameters for the **Mouse** ROS

| Symbol                           | Units                           | Definition                                                                               | Value                | References                                   |
|----------------------------------|---------------------------------|------------------------------------------------------------------------------------------|----------------------|----------------------------------------------|
| $\alpha_{\max}$                  | $\mu\text{M}/\text{s}$          | Maximum rate of cGMP synthesis at low $\text{Ca}^{2+}$ concentration                     | 76.5                 | [3, 66]                                      |
| $\alpha_{\max}/\alpha_{\min}$    | -                               | Suppression ratio of $\alpha$ from high to low $\text{Ca}^{2+}$ concentration            | 13.9                 | [2, 3, 66]                                   |
| $A_{\text{inc}}$                 | $\mu\text{m}^2$                 | Area of the incisure                                                                     | 0.0403               |                                              |
| $\beta_{\text{dark}}$            | $\text{s}^{-1}$                 | Rate of cGMP hydrolysis by dark activated PDE                                            | 2.9                  | [8, 66]                                      |
| $B_{\text{cG}}$                  | -                               | Buffering power of cytoplasm for cGMP                                                    | 1                    | [53, 54]                                     |
| $B_{\text{Ca}}$                  | -                               | Buffering power of cytoplasm for $\text{Ca}^{2+}$                                        | 20                   | [46, 47, 48]                                 |
| $c_{\text{TE}}$                  | -                               | Coupling coefficient from $\text{T}^*$ to $\text{E}^*$                                   | 1                    | [54, 34]                                     |
| $[\text{cGMP}]_{\text{dark}}$    | $\mu\text{M}$                   | Concentration of cGMP in the dark                                                        | 3.80                 | [2, 30, 48, 51, 52, 53, 54, 66]              |
| $[\text{Ca}^{2+}]_{\text{dark}}$ | $\text{nM}$                     | Concentration of $\text{Ca}^{2+}$ in the dark                                            | 344                  | [41, 71, 37, 16]                             |
| $D_{\text{cG}}$                  | $\mu\text{m}^2/\text{s}$        | Diffusion coefficient of cGMP                                                            | 120                  | [7, 24, 49]                                  |
| $D_{\text{Ca}}$                  | $\mu\text{m}^2/\text{s}$        | Diffusion coefficient of $\text{Ca}^{2+}$                                                | 15                   | [46]                                         |
| $D_{\text{E}^*}$                 | $\mu\text{m}^2/\text{s}$        | Diffusion coefficient of $\text{E}^*$                                                    | 1.2                  | [53]                                         |
| $D_{\text{T}^*}$                 | $\mu\text{m}^2/\text{s}$        | Diffusion coefficient of $\text{T}^*$                                                    | 2.2                  | [53]                                         |
| $D_{\text{R}^*}$                 | $\mu\text{m}^2/\text{s}$        | Diffusion coefficient of $\text{R}^*$                                                    | 1.5                  | [53]                                         |
| $\varepsilon_o$                  | $\text{nm}$                     | Disc thickness                                                                           | 14.5                 | [4, 19, 53]                                  |
| $\eta$                           | $\text{nm}$                     | Volume-to-surface ratio                                                                  | 7.25                 |                                              |
| $\mathcal{F}$                    | $\text{Cmol}^{-1}$              | Faraday's constant                                                                       | 96500                |                                              |
| $f_{\text{Ca}}$                  | -                               | Fraction of cGMP-activated current carried by $\text{Ca}^{2+}$                           | 0.06                 | [3, 39, 54, 57, 60]                          |
| $H$                              | $\mu\text{m}$                   | Height of ROS                                                                            | 23.6                 | [4, 36, 38, 15, 14, 31, 32]                  |
| $j_{\text{dark}}$                | $\text{pA}$                     | Dark current                                                                             | 10.9                 | [2, 3, 8, 9, 18, 27, 28, 44, 54, 68, 70, 72] |
| $j_{\text{cG}}^{\max}$           | $\text{pA}$                     | Maximum CNG channel current                                                              | 3550                 |                                              |
| $j_{\text{ex}}^{\text{sat}}$     | $\text{pA}$                     | Saturated exchanger current                                                              | 1.8                  | [59, 61, 62]                                 |
| $k_{\text{cat}}/K_{\text{m}}$    | $\mu\text{M}^{-1}\text{s}^{-1}$ | Hydrolytic efficiency of activated PDE dimer                                             | 540                  | [53, 34, 55]                                 |
| $k_{\sigma;\text{hyd}}$          | $\mu\text{m}^3/\text{s}$        | Surface hydrolysis rate of cGMP by dark-activated PDE                                    | $2.8 \times 10^{-5}$ |                                              |
| $k_{\sigma;\text{hyd}}^*$        | $\mu\text{m}^3/\text{s}$        | Surface hydrolysis rate of cGMP by light-activated PDE                                   | 0.9                  |                                              |
| $k_{\text{E}}$                   | $\text{s}^{-1}$                 | Rate constant for inactivation of PDE                                                    | 6.5                  | [8, 25, 29, 39]                              |
| $k_{\text{R}}$                   | $\text{s}^{-1}$                 | Rate constant for inactivation of $\text{R}^*$                                           | 8.5                  | [8, 29, 47]                                  |
| $k_{\text{T}^*\text{E}}$         | $\mu\text{m}^2/\text{s}$        | Kinetic constant of $\text{T}^*$ - $\text{E}$ formation and thus $\text{E}^*$ production | 1                    | [56]                                         |
| $K_{\text{cyc}}$                 | $\text{nM}$                     | Half-saturating $[\text{Ca}^{2+}]$ for GC activity                                       | 100                  | [3, 66, 40, 42]                              |
| $K_{\text{cG}}$                  | $\mu\text{M}$                   | $[\text{cGMP}]$ for half maximal CNG channel opening                                     | 20                   | [54]                                         |
| $K_{\text{ex}}$                  | $\mu\text{M}$                   | $[\text{Ca}^{2+}]$ for half maximal exchanger rate                                       | 1.6                  | [54, 61]                                     |
| $\ell_b$                         | $\mu\text{m}$                   | Width of the incisure                                                                    | 0.2593               | [11]                                         |
| $\ell_r$                         | $\mu\text{m}$                   | Length of the incisure                                                                   | 0.3111               | [11]                                         |
| $\nu$                            | -                               | Ratio between interdiscal space and disc thickness                                       | 1                    | [4, 34, 53, 54]                              |
| $\nu\varepsilon_o$               | $\text{nm}$                     | Interdiscal space                                                                        | 14.5                 | [4, 36, 38, 53, 20]                          |

Continued on next page

Table S1 – continued from previous page

| Symbol           | Units          | Definition                                                                    | Value                 | References                      |
|------------------|----------------|-------------------------------------------------------------------------------|-----------------------|---------------------------------|
| $\nu_{RG}$       | $s^{-1}$       | Rate of transducin formation per fully activated $R^*$                        | 330                   | [22]                            |
| $n$              | -              | Number of discs                                                               | 814                   |                                 |
| $n_{inc}$        | -              | Number of incisures                                                           | 1                     | [4, 11, 53]                     |
| $N_{Av}$         | $\#mol^{-1}$   | Avogadro number                                                               | $6.02 \times 10^{23}$ |                                 |
| $m_{cyc}$        | -              | Hill coefficient for GC effect                                                | 2                     | [2, 3, 8, 39, 66]               |
| $m_{cG}$         | -              | Hill coefficient for CNG channels                                             | 3.5                   | [2, 8, 45, 53, 66]              |
| $PDE^*$          | $\#\mu m^{-2}$ | Surface density of dark-activated PDE                                         | 750                   | [19, 36, 53, 54, 65]            |
| $R$              | $\mu m$        | Radius of disc                                                                | 0.685                 | [4, 19, 33, 35, 36, 38, 53, 54] |
| $\sigma$         | -              | Ratio between outer shell thickness and disc thickness                        | 15/14.5               |                                 |
| $\sigma\epsilon$ | $nm$           | Distance between the disc rim and the plasma membrane (outer shell thickness) | 15                    | [12, 13, 53, 20]                |
| $\Sigma_{rod}$   | $\mu m^2$      | Lateral surface area of ROS                                                   | 103.8                 |                                 |
| $V_{cyt}$        | $\mu m^3$      | Cytoplasmic volume                                                            | 18.16                 |                                 |

### B.1.1 Mouse Deactivation Parameters in the Continuous Time Markov Chain (CTMC)

Determination of these parameters is in [5] and calibrated to ensure that the average lifetime  $\tau_{R,eff}$  of  $R^*$  is  $\frac{1}{2}t_{peak}$ . The value  $t_{peak}$  for  $D_{cG} = 330\mu m^2/s$  is essentially the same as for  $D_{cG} = 120\mu m^2/s$ , so that the

Table S2: **Mouse** CTMC Model Parameters

| Symbol         | Units    | Definition                                       | Value | References |
|----------------|----------|--------------------------------------------------|-------|------------|
| $\lambda_o$    | $s^{-1}$ | Rhodopsin phosphorylation rate                   | 10.5  | [5]        |
| $\mu_o$        | $s^{-1}$ | Arrestin binding rate                            | 60    | [5]        |
| $k_\nu$        | -        | Decay constant of catalytic activity of $R^*$    | 0.5   | [69]       |
| $\tau_{R,eff}$ | ms       | Average lifetime of active $R^*$                 | 75    | [29]       |
| $N$            | -        | Average number of steps of $R^*$ before shut-off | 4.45  | [5]        |

parameters in Table S2 based on  $\tau_{R,eff} \approx \frac{1}{2}t_{peak}$  ([5]) remain unchanged for these two values of  $D_{cG}$ . In particular  $\lambda_o$  and  $\mu_o$  were chosen to ensure that the average lifetime of  $R^*$  is  $\frac{1}{2}t_{peak}$ .

## B.2 Salamander Parameters

Table S3: Parameters for the **Salamander** ROS

| Symbol                      | Units     | Definition                                                    | Range | Value | References     |
|-----------------------------|-----------|---------------------------------------------------------------|-------|-------|----------------|
| $\alpha_{max}$              | $\mu M/s$ | Maximum rate of cGMP synthesis at low $Ca^{2+}$ concentration | 40-50 | 50    | [54, 48]       |
| $\alpha_{max}/\alpha_{min}$ | -         | Ratio of $\alpha_{max}$ to $\alpha_{min}$                     | 50    | 50    | [54, 48]       |
| $A_{inc}$                   | $\mu m^2$ | Area of the incisure                                          | 0.82  | 0.8   | [49]           |
| $\beta_{dark}$              | $s^{-1}$  | Rate of cGMP hydrolysis by dark activated PDE                 | 1     | 1     | [54, 48, 7, 6] |
| $B_{cG}$                    | -         | Buffering power of cytoplasm for cGMP                         | 1-2   | 1     | [48, 53, 54]   |

Continued on next page

Table S3 – continued from previous page

| Symbol             | Units              | Definition                                                                                      | Range     | Value                 | References               |
|--------------------|--------------------|-------------------------------------------------------------------------------------------------|-----------|-----------------------|--------------------------|
| $B_{Ca}$           | -                  | Buffering power of cytoplasm for $Ca^{2+}$                                                      | 10-50     | 20                    | [54, 48, 47]             |
| $c_{TE}$           | -                  | Coupling coefficient from $T^*$ to $E^*$                                                        | < 1       | 1                     | [54, 34]                 |
| $[cGMP]_{dark}$    | $\mu M$            | Concentration of cGMP in the dark                                                               | 2-4       | 3.0046                | [48, 30]                 |
| $[Ca^{2+}]_{dark}$ | $nM$               | Concentration of $Ca^{2+}$ in the dark                                                          | 400-700   | 653.7                 | [48, 30]                 |
| $D_{cG}$           | $\mu m^2/s$        | Diffusion coefficient of <i>cGMP</i>                                                            | 50-196    | 160                   | [7, 26, 49]              |
| $D_{Ca}$           | $\mu m^2/s$        | Diffusion coefficient of $Ca^{2+}$                                                              | 15        | 15                    | [46]                     |
| $D_{E^*}$          | $\mu m^2/s$        | Diffusion coefficient for activated PDE                                                         | 0.8       | 0.8                   | [53]                     |
| $D_{T^*}$          | $\mu m^2/s$        | Diffusion coefficient for activated G protein                                                   | 1.5       | 1.5                   | [53]                     |
| $D_{R^*}$          | $\mu m^2/s$        | Diffusion coefficient for $R^*$                                                                 | 0.7       | 0.7                   | [53]                     |
| $\epsilon_o$       | $nm$               | Disc thickness                                                                                  | 10-14     | 14                    | [54, 30]                 |
| $\eta$             | $nm$               | Volume-to-surface ratio                                                                         |           | 7                     |                          |
| $\mathcal{F}$      | $Cmol^{-1}$        | Faraday's constant                                                                              | 96500     | 96500                 | [54, 48]                 |
| $f_{Ca}$           | -                  | Fraction of <i>cGMP</i> -activated current carried by $Ca^{2+}$                                 | 0.1-0.2   | 0.17                  | [54, 48]                 |
| $H$                | $\mu m$            | Height of ROS                                                                                   | 19-26     | 22.4                  | [54, 23, 43, 10]         |
| $J_{dark}$         | $pA$               | Dark current                                                                                    | 74        | 65.862                | [54]                     |
| $J_{cG}^{max}$     | $pA$               | Maximum <i>cGMP</i> -gated channel current                                                      | 70-7000   | 7000                  | [48]                     |
| $J_{ex}^{sat}$     | $pA$               | Saturated exchanger current                                                                     | 17-20     | 17                    | [54]                     |
| $k_{cat}/K_m$      | $\mu M^{-1}s^{-1}$ | Hydrolytic efficiency of activated PDE dimer                                                    | 340-600   | 400                   | [53, 48, 34]             |
| $k_{\sigma;hyd}$   | $\mu m^3/s$        | Surface hydrolysis rate of <i>cGMP</i> by dark-activated PDE                                    |           | $7 \times 10^{-5}$    | [7]                      |
| $k_{\sigma;hyd}^*$ | $\mu m^3/s$        | Surface hydrolysis rate of <i>cGMP</i> by light-activated PDE                                   |           | 0.5                   | [1, 7]                   |
| $k_E$              | $s^{-1}$           | Rate constant for inactivation of PDE                                                           | 0.58-0.76 | 0.58                  | [47]                     |
| $k_R$              | $s^{-1}$           | Rate constant for inactivation of $R^*$                                                         | 1.69-3.48 | 2.5                   | [47]                     |
| $k_{T^*E}$         | $\mu m^2/s$        | Kinetic constant describing the formation of $T^* - E$ complex and thus the production of $E^*$ | 1         | 1                     | [56]                     |
| $K_{cyc}$          | $nM$               | Half-saturating $[Ca^{2+}]$ for GC activity                                                     | 100-230   | 135                   | [48, 30]                 |
| $K_{cG}$           | $\mu M$            | $[cGMP]$ for half maximal CNG channel opening                                                   | 13-32     | 20                    | [54, 48, 30]             |
| $K_{ex}$           | $\mu M$            | $[Ca^{2+}]$ for half maximal exchanger rate                                                     | 1.5-1.6   | 1.5                   | [48, 30]                 |
| $\ell_b$           | $nm$               | Width of the incisure                                                                           | 10-12     | 15                    | [49]                     |
| $\ell_r$           | $\mu m$            | Length of the incisure                                                                          |           | 4.6377                | [6]                      |
| $\nu$              | -                  | Ratio between interdiscal space and disc thickness                                              |           | 1                     |                          |
| $\nu\epsilon_o$    | $nm$               | Interdiscal space                                                                               | 10-14     | 14                    | [54, 30]                 |
| $\nu_{RG}$         | $s^{-1}$           | Rate of transducin formation per fully activated $R^*$                                          | 120-220   | 185                   | [22, 34, 48, 54]         |
| $n$                | -                  | Number of discs                                                                                 | 1000      | 800                   | [48, 30]                 |
| $n_{inc}$          | -                  | Number of incisures                                                                             | 15-30     | 23                    | [17, 67, 50, 35, 58, 49] |
| $N_{Av}$           | $\#mol^{-1}$       | Avogadro number                                                                                 |           | $6.02 \times 10^{23}$ |                          |
| $m_{cyc}$          | -                  | Hill coefficient for GC effect                                                                  | 2         | 2                     | [34, 54, 26]             |
| $m_{cG}$           | -                  | Hill coefficient for CNG channels                                                               | 2-3       | 2.5                   | [54]                     |
| $PDE^*$            | $\#\mu m^{-2}$     | Surface density of dark-activated PDE                                                           | 100       | 100                   | [54]                     |
| $R$                | $\mu m$            | Radius of disc                                                                                  | 4.7-7.6   | 5.5                   | [23, 43, 64, 10]         |

Continued on next page

Table S3 – continued from previous page

| Symbol                | Units           | Definition                                                                    | Range | Value | References |
|-----------------------|-----------------|-------------------------------------------------------------------------------|-------|-------|------------|
| $\sigma$              | -               | Ratio between outer shell thickness and disc thickness                        |       | 15/14 | [48, 30]   |
| $\sigma\varepsilon$   | nm              | Distance between the disc rim and the plasma membrane (outer shell thickness) | 15    | 15    | [48, 30]   |
| $\Sigma_{\text{rod}}$ | $\mu\text{m}^2$ | Lateral surface area of ROS                                                   |       | 773.5 | [30]       |
| $V_{\text{cyt}}$      | $\mu\text{m}^3$ | Cytoplasmic volume                                                            | 1000  | 1076  | [54, 30]   |

### B.2.1 Salamander Deactivation Parameters in the Continuous Time Markov Chain (CTMC)

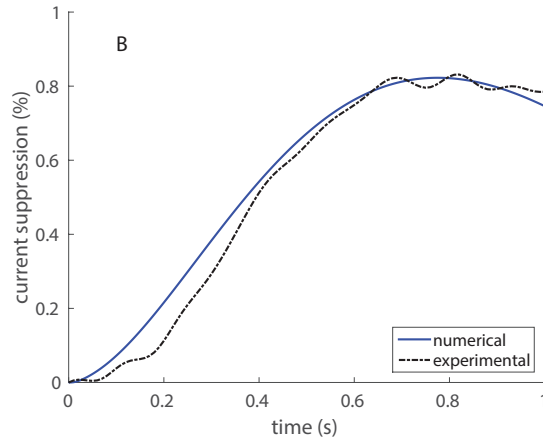

Figure S1: Simulation of the experimentally observed SPR of salamander kindly provided by F. Rieke as reported in [7] (black trace) using the FSR model with the parameters from Table S3 (blue trace).

These parameters are determined as in [5]. In particular  $\lambda_o$  and  $\mu_o$  were chosen to ensure, as for mouse, that the average lifetime of  $R^*$  is  $\frac{1}{2}t_{\text{peak}}$ . The parameters  $k_\nu = 0.41$  and  $\nu_{\text{RG}} = 185/\text{s}$  were chosen to fit the experimental SPR curve reported in [7] and kindly provided by F. Rieke.

Table S4: Salamander CTMC Model Parameters

| Symbol                | Units           | Definition                                                          | Value |
|-----------------------|-----------------|---------------------------------------------------------------------|-------|
| $\lambda_o$           | $\text{s}^{-1}$ | Rhodopsin phosphorylation rate                                      | 2.0   |
| $\mu_o$               | $\text{s}^{-1}$ | Arrestin binding rate                                               | 10    |
| $k_\nu$               | -               | Rate of catalytic activity of $R^*$                                 | 0.41  |
| $\tau_{\text{R,eff}}$ | s               | Average lifetime of $R^*$                                           | 0.4   |
| N                     | -               | Average number of phosphorylation steps of $R^*$ before full quench | 4.45  |

## C Appendix. Calibrating the Mouse Activation Parameter $\nu_{\text{RG}}$ for $D_{\text{cG}} = 330\mu\text{m}^2/\text{s}$

The model parameters for mouse, including the volumic diffusivity  $D_{\text{cG}} = 120\mu\text{m}^2/\text{s}$  were chosen and justified in [63, 5], and reported here in Table S1. The diffusivity  $D_{\text{cG}} = 330\mu\text{m}^2/\text{s}$  proposed in [21], was imported here



by keeping all the remaining parameters unchanged except the catalytic activity  $\nu_{\text{RG}}$ , which was adjusted from  $330\text{s}^{-1}$  to  $230\text{s}^{-1}$  to reproduce the experimental SPR of [3, 5] (Figure S2).

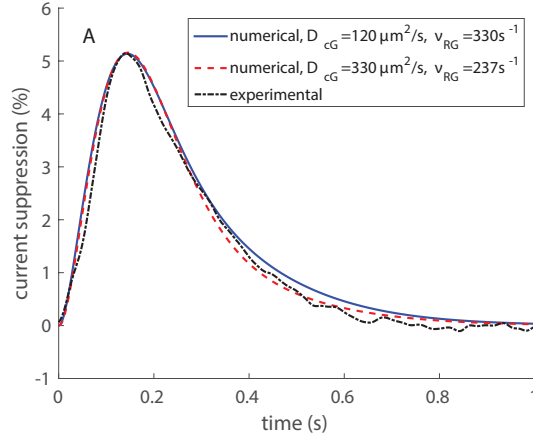

Figure S2: FSR simulations of the experimentally observed mouse rod SPR (black trace), from [3], using the parameters from Table S1 (red trace) and upon raising  $D_{\text{cG}}$  to  $330\mu\text{m}^2/\text{s}$  with a concomitant lowering of  $\nu_{\text{RG}}$  to  $230\text{s}^{-1}$  (blue trace).

## D Appendix. Relating Volumic and Longitudinal Diffusivities

The longitudinal diffusivity  $D_{\text{cG}}^\ell$  along the axis of the ROS, can be derived from the volumic  $D_{\text{cG}}$  by the formula  $D_{\text{cG}}^\ell = (f_A/f_V)D_{\text{cG}}$ , where  $f_A$  and  $f_V$  are two geometric parameters computed in [6] as

$$f_A = \frac{(A_{\text{inc}} + A_{\text{gap}})}{\pi R^2 + A_{\text{gap}}}; \quad f_V = \frac{\pi R^2 + 2(A_{\text{inc}} + A_{\text{gap}})}{2(\pi R^2 + A_{\text{gap}})}$$

where  $A_{\text{inc}}$  is the total cross-sectional area of the incisures,  $A_{\text{gap}}$  is the cross-sectional area of the outer shell and  $R$  is the cross-sectional radius of the ROS.

## References

- [1] D. Andreucci, P. Bisegna, G. Caruso, H. E. Hamm, and E. DiBenedetto. Mathematical model of the spatio-temporal dynamics of second messengers in visual transduction. *Biophys. J.*, 85:1358–1376, 2003.
- [2] M. E. Burns, A. Mendez, J. Chen, and D. A. Baylor. Dynamics of cyclic GMP synthesis in retinal rods. *Neuron*, 36:81–91, 2002.
- [3] P. D. Calvert, V. I. Govardovskii, N. Krasnoperova, R. E. Anderson, J. Lem, and C. L. Makino. Membrane protein diffusion sets the speed of rod phototransduction. *Nature*, 411:90–94, 2001.
- [4] L. D. Carter-Dawson and M. M. LaVail. Rods and cones in the mouse retina i. structural analysis using light and electron microscopy. *J. Comp. Neurol.*, 188:245–262, 1979.
- [5] G. Caruso, P. Bisegna, L. Lenoci, D. Andreucci, V. V. Gurevich, H. E. Hamm, and E. DiBenedetto. Kinetics of rhodopsin deactivation and its role in regulating recovery and reproducibility of rod photoreponse. *PLoS Comput. Biol.*, 6(12):1–15, 2010. doi:10.1371/journal.pcbi.1001031.
- [6] G. Caruso, P. Bisegna, L. Shen, D. Andreucci, H. E. Hamm, and E. DiBenedetto. Modeling the role of incisures in vertebrate phototransduction. *Biophys. J.*, 91:1192–1212, 2006.

- [7] G. Caruso, H. Khanal, V. Alexiades, F. Rieke, H. E. Hamm, and E. DiBenedetto. Mathematical and computational modelling of spatio-temporal signalling in rod phototransduction. *I.E.E. Proc. Syst. Biol.*, 152:119–137, 2005.
- [8] C. K. Chen, M. E. Burns, W. He, T. G. Wensel, D. A. Baylor, and M. I. Simon. Slowed recovery of rod photoresponse in mice lacking the GTPase accelerating protein RGS9-1. *Nature*, 403:557–560, 2000.
- [9] C. K. Chen, M. E. Burns, M. Spencer, G. A. Niemi, J. Chen, J. B. Hurley, D. A. Baylor, and M. I. Simon. Abnormal photoresponses and light-induced apoptosis in rods lacking rhodopsin kinase. *Proc. Natl. Acad. Sci. U.S.A.*, 96:3718–3722, 1999.
- [10] Y. Chen, S. Znoiko, W. J. DeGrip, R. K. Crouch, and J.-X. Ma. Salamander blue-sensitive cones lost during metamorphosis. *Photochem. Photobiol.*, 84:855–862, 2008.
- [11] A. I. Cohen. The ultrastructure of the rods of the mouse retina. *Am. J. Anat.*, 107:23–48, 1960.
- [12] J. M. Corless, R. D. Fetter, and M. J. Costello. Structural features of the terminal loop region of frog retinal rod outer segment disk membranes: I. Organization of lipid components. *J. Comp. Neurol.*, 257(1):1–8, 1987.
- [13] J. M. Corless, R. D. Fetter, O. B. Zampighi, M. J. Costello, and D. L. Wall-Buford. Structural features of the terminal loop region of frog retinal rod outer segment disk membranes: II. Organization of the terminal loop complex. *J. Comp. Neurol.*, 257(1):9–23, 1987.
- [14] G. H. Daly, J. M. Dileonardo, N. R. Balkema, and G. W. Balkema. The relationship between ambient lighting conditions, absolute dark-adapted thresholds, and rhodopsin in black and hyppopigmented mice. *Vis. Neurosci.*, 21:925–934, 2004.
- [15] L. L. Daniele, C. Insinna, R. Chance, J. Wang, S. S. Nikonov, and E. N. Pugh Jr. A mouse M-opsin monochromat: retinal cone photoreceptors have increased M-opsin expression when S-opsin is knocked out. *Vision Res.*, 51:447–458, 2011.
- [16] A. M. Dizhoor, M. L. Woodruff, E. V. Olshevskaya, M. C. Cilluffo, M. C. Cornwall, P. A. Sieving, and G. L. Fain. Night blindness and the mechanism of constitutive signaling of mutant G90D rhodopsin. *J. Neurosci.*, 28:11662–11672, 2008.
- [17] M. S. Eckmiller. Microtubules in a rod-specific cytoskeleton associated with outer segment incisures. *Vis. Neurosci.*, 17:711–722, 2000.
- [18] J. Fan, M. L. Woodruff, M. C. Cilluffo, R. K. Crouch, and G. L. Fain. Opsin activation of transduction in the rods of dark-reared Rpe65 knockout mice. *J. Physiol.*, 568:83–95, 2005.
- [19] D. Fotiadis, Y. Liang, S. Filipek, D. A. Saperstein, A. Engel, and K. Palczewski. Atomic force microscopy: rhodopsin dimers in native disc membranes. *Nature*, 421:127–128, 2003.
- [20] J. C. Gilliam, J. T. Chang, I. M. Sandoval, Y. Zhang, T. Li, S. J. Pittler, W. Chiu, and T. G. Wensel. Three-dimensional architecture of the rod sensory cilium and its disruption in retinal neurodegeneration. *Cell*, 151(5):1029–1041, Nov 2012.
- [21] O. P. Gross, E. N. Pugh Jr., and M. E. Burns. Spatiotemporal cGMP dynamics in living mouse rods. *Biophys. J.*, 102(8):1775–1784, 2012.
- [22] R. D. Hamer, S. C. Nicholas, D. Tranchina, P. A. Liebman, and T. D. Lamb. Multiple steps of phosphorylation of activated rhodopsin can account for the reproducibility of vertebrate rod single-photon responses. *J. Gen. Physiol.*, 122:419–444, 2003.
- [23] F. I. Harosi. Absorption spectra and linear dichroism of some amphibian photoreceptors. *J. Gen. Physiol.*, 66:357–382, 1975.

- [24] D. Holcman and J. I. Korenbrot. Longitudinal diffusion in retinal rod and cone outer segment cytoplasm: the consequence of cell structure. *Biophys. J.*, 86:2566–2582, 2004.
- [25] M. J. Kennedy, M. E. Sowa, T. G. Wensel, and J. B. Hurley. Acceleration of key reactions as a strategy to elucidate the rate-limiting chemistry underlying phototransduction inactivation. *Invest. Ophthalmol. Vis. Sci.*, 44:1016–1022, 2003.
- [26] Y. Koutalos, K. Nakatani, and K. W. Yau. Cyclic GMP diffusion coefficient in rod photoreceptor outer segments. *Biophys. J.*, 68:373–382, 1995.
- [27] C. M. Krispel, C. K. Chen, M. I. Simon, and M. E. Burns. Novel form of adaptation in mouse retinal rods speeds recovery of phototransduction. *J. Gen. Physiol.*, 122:703–712, 2003.
- [28] C. M. Krispel, C. K. Chen, M. I. Simon, and M. E. Burns. Prolonged photoresponses and defective adaptation in rods of Gbeta5<sup>-/-</sup> mice. *J. Neurosci.*, 23:6965–6971, 2003.
- [29] C. M. Krispel, D. Chen, N. Melling, Y. J. Chen, K. A. Martemyanov, N. Quillinan, V. Y. Arshavsky, T. G. Wensel, C. K. Chen, and M. E. Burns. RGS expression rate-limits recovery of rod photoresponses. *Neuron*, 51:409–416, 2006.
- [30] T. D. Lamb and E. N. Pugh Jr. A quantitative account of the activation steps involved in phototransduction in amphibian photoreceptors. *J. Physiol.*, 449:719–758, 1992.
- [31] M. M. LaVail. Kinetics of rod outer segment renewal in the developing mouse retina. *J. Cell. Biol.*, 58:650–661, 1973.
- [32] M. M. LaVail, M. P. White, G. M. Gorrin, D. Yasumura, K. V. Porrello, and R. J. Mullen. Retinal degeneration in the nervous mutant mouse. I. Light microscopic cytopathology and changes in the interphotoreceptor matrix. *J. Comp. Neurol.*, 333:168–181, 1993.
- [33] J. Lem, N. V. Krasnoperova, P. D. Calvert, B. Kosaras, D. A. Cameron, M. Nicolo, C. L. Makino, and R. L. Sidman. Morphological, physiological, and biochemical changes in rhodopsin knockout mice. *Proc. Natl. Acad. Sci. U. S. A.*, 96:736–741, 1999.
- [34] I. B. Leskov, V. A. Klenchin, J. W. Handy, G. G. Whitlock, V. I. Govardovskii, M. D. Bownds, T. D. Lamb, E. N. Pugh Jr., and V. Y. Arshavsky. The gain of rod phototransduction: reconciliation of biochemical and electrophysiological measurements. *Neuron*, 27:525–537, 2000.
- [35] Y. Liang, D. Fotiadis, S. Filipek, D. A. Saperstein, K. Palczewski, and A. Engel. Organization of the G protein-coupled receptors rhodopsin and opsin in native membranes. *J. Biol. Chem.*, 278:21655–21662, 2003.
- [36] Y. Liang, D. Fotiadis, T. Maeda, A. Maeda, A. Modzelewska, S. Filipek, D. A. Saperstein, A. Engel, and K. Palczewski. Rhodopsin signaling and organization in heterozygote rhodopsin knockout mice. *J. Biol. Chem.*, 279:48189–48196, 2004.
- [37] X. Liu, O. V. Bulgakov, X. H. Wen, M. L. Woodruff, B. Pawlyk, J. Yang, G. L. Fain, M. A. Sandberg, C. L. Makino, and T. Li. AIPL1, the protein that is defective in Leber congenital amaurosis, is essential for the biosynthesis of retinal rod cGMP phosphodiesterase. *Proc. Natl. Acad. Sci. U.S.A.*, 101(38):13903–13908, 2004.
- [38] A. L. Lyubarsky, L. L. Daniele, and E. N. Pugh Jr. From candelas to photoisomerizations in the mouse eye by rhodopsin bleaching in situ and the light-rearing dependence of the major components of the mouse ERG. *Vision Res.*, 44:3235–3251, 2004.
- [39] C. L. Makino, R. L. Dodd, J. Chen, M. E. Burns, A. Roca, M. I. Simon, and D. A. Baylor. Recoverin regulates light-dependent phosphodiesterase activity in retinal rods. *J. Gen. Physiol.*, 123:729–741, 2004.

- [40] C. L. Makino, I. V. Peshenko, X.-H. Wen, E. V. Olshevskaya, and R. Barrett. A role for GCAP2 in regulating the photoresponse. guanylyl cyclase activation and rod electrophysiology in GUCA 1B knock-out mice. *J. Biol. Chem.*, 283(43):29135–29143, 2008.
- [41] C. L. Makino, X.-H. Wen, N. Michaud, I. V. Peshenko, B. Pawlyk, R. S. Brush, M. Soloviev, X. Liu, M. L. Woodruff, P. D. Calvert, A. B. Savchenko, R. E. Anderson, G. L. Fain, T. Li, M. A. Sandberg, and A. M. Dizhoor. Effects of low AIPL1 expression on phototransduction in rods. *Invest. Ophthalmol. Vis. Sci.*, 47(5):2185–2194, 2006.
- [42] C. L. Makino, X. H. Wen, E. V. Olshevskaya, I. V. Peshenko, A. B. Savchenko, and A. M. Dizhoor. Enzymatic relay mechanism stimulates cyclic GMP synthesis in rod photoresponse: biochemical and physiological study in guanylyl cyclase activating protein 1 knockout mice. *PLoS ONE*, 7(10):e47637, 2012.
- [43] A. P. Mariani. Photoreceptors of the larval tiger salamander. *Proc. Roy. Soc. Lond.*, B 227:483–492, 1986.
- [44] A. Mendez, M. E. Burns, A. Roca, J. Lem, L. W. Wu, M. I. Simon, D. A. Baylor, and J. Chen. Rapid and reproducible deactivation of rhodopsin requires multiple phosphorylation sites. *Neuron*, 28:153–164, 2000.
- [45] A. Mendez and J. Chen. Mouse models to study GCAP functions in intact photoreceptors. *Adv. Exp. Med. Biol.*, 514:361–388, 2002.
- [46] K. Nakatani, C. Chen, and Y. Koutalos. Calcium diffusion coefficient in rod photoreceptor outer segments. *Biophys. J.*, 82(2):728–739, 2002.
- [47] S. Nikonov, N. Engheta, and E. N. Pugh Jr. Kinetics of recovery of the dark-adapted salamander rod photoresponse. *J. Gen. Physiol.*, 111:7–37, 1998.
- [48] S. Nikonov, T. D. Lamb, and E. N. Pugh Jr. The role of steady phosphodiesterase activity in the kinetics and sensitivity of the light-adapted salamander rod photoresponse. *J. Gen. Physiol.*, 116:795–824, 2000.
- [49] A. Olson and E. N. Pugh Jr. Diffusion coefficient of cyclic GMP in salamander rod outer segments estimated with two fluorescent probes. *Biophys. J.*, 65:1335–1352, 1993.
- [50] D. S. Papermaster, P. Reilly, and B. G. Schneider. Cone lamellae and red and green rod outer segment disks contain a large intrinsic membrane protein on their margins: an ultrastructural immunocytochemical study of frog retinas. *Vision Res.*, 22:1417–1428, 1982.
- [51] E. N. Pugh Jr., T. Duda, A. Sitaramayya, and R. K. Sharma. Photoreceptor guanylate cyclases: a review. *Biosci. Rep.*, 17:429–473, 1997.
- [52] E. N. Pugh Jr. and T. D. Lamb. Cyclic GMP and calcium: the internal messengers of excitation and adaptation in vertebrate photoreceptors. *Vision Res.*, 30:1923–1948, 1990.
- [53] E. N. Pugh Jr. and T. D. Lamb. Amplification and kinetics of the activation steps in phototransduction. *Biochim. Biophys. Acta*, 1141:111–149, 1993.
- [54] E. N. Pugh Jr. and T. D. Lamb. *Phototransduction in vertebrate rods and cones: molecular mechanisms of amplification, recovery and light adaptation*, volume 3 of *Handbook of Biological Physics*, chapter 5, pages 183–255. Elsevier Science, 2000.
- [55] N. Qin and W. Baehr. Expression and mutagenesis of mouse rod photoreceptor cGMP phosphodiesterase. *J. Biol. Chem.*, 269:3265–3271, 1994.
- [56] S. Ramanathan, P. B. Detwiler, A. M. Sengupta, and B. I. Shraiman. G-protein-coupled enzyme cascades have intrinsic properties that improve signal localization and fidelity. *Biophys. J.*, 88:3063–3071, 2005.

- [57] H. Reilander, A. Achilles, U. Friedel, G. Maul, F. Lottspeich, and N. J. Cook. Primary structure and functional expression of the Na/Ca,K-exchanger from bovine rod photoreceptors. *EMBO J.*, 11:1689–1695, 1992.
- [58] D. Roof, M. Adamian, D. Jacobs, and A. Hayes. Cytoskeletal specializations at the rod photoreceptor distal tip. *J. Comp. Neurol.*, 305:289–303, 1991.
- [59] P. P. Schnetkamp. Na-Ca or Na-Ca-K exchange in rod photoreceptors. *Prog. Biophys. Mol. Biol.*, 54:1–29, 1989.
- [60] P. P. Schnetkamp. Cation selectivity of and cation binding to the cGMP-dependent channel in bovine rod outer segment membranes. *J. Gen. Physiol.*, 96:517–534, 1990.
- [61] P. P. Schnetkamp. Optical measurements of Na-Ca-K exchange currents in intact outer segments isolated from bovine retinal rods. *J. Gen. Physiol.*, 98:555–573, 1991.
- [62] P. P. Schnetkamp, R. T. Szerencsei, and D. K. Basu. Unidirectional Na<sup>+</sup>, Ca<sup>2+</sup>, and K<sup>+</sup> fluxes through the bovine rod outer segment Na-Ca-K exchanger. *J. Biol. Chem.*, 266:198–206, 1991.
- [63] L. Shen, G. Caruso, P. Bisegna, D. Andreucci, V. V. Gurevich, H. E. Hamm, and E. DiBenedetto. Dynamics of mouse rod phototransduction and its sensitivity to variation of key parameters. *IET Syst. Biol.*, 4:12–32, 2010.
- [64] D. M. Sherry, D. D. Bui, and W. J. DeGrip. Identification and distribution of photoreceptor subtypes in neotenic salamander retina. *Vis. Neurosci.*, 15:1175–1187, 1998.
- [65] A. Sitaramayya, J. Harkness, J. H. Parkes, C. Gonzalez-Oliva, and P. A. Liebman. Kinetic studies suggest that light-activated cyclic GMP phosphodiesterase is a complex with G-protein subunits. *Biochemistry*, 25:651–656, 1986.
- [66] S. H. Tsang, M. E. Burns, P. D. Calvert, P. Gouras, D. A. Baylor, S. P. Goff, and V. Y. Arshavsky. Role for the target enzyme in deactivation of photoreceptor G protein in vivo. *Science*, 282:117–121, 1998.
- [67] Y. Tsukamoto. The number, depth and elongation of disc incisures in the retinal rod of *Rana catesbeiana*. *Exp. Eye Res.*, 45:105–116, 1987.
- [68] Z. Wang, X. H. Wen, Z. Ablonczy, R. K. Crouch, C. L. Makino, and J. Lem. Enhanced shutoff of phototransduction in transgenic mice expressing palmitoylation-deficient rhodopsin. *J. Biol. Chem.*, 280:24293–24300, 2005.
- [69] U. Wilden. Duration and amplitude of the light-induced cGMP hydrolysis in vertebrate photoreceptors are regulated by multiple phosphorylation of rhodopsin and by arrestin binding. *Biochemistry*, 34:1446–1454, 1995.
- [70] M. L. Woodruff, J. Lem, and G. L. Fain. Early receptor current of wild-type and transducin knockout mice: photosensitivity and light-induced Ca<sup>2+</sup> release. *J. Physiol.*, 557:821–828, 2004.
- [71] M. L. Woodruff, A. P. Sampath, H. R. Matthews, N. V. Krasnoperova, J. Lem, and G. L. Fain. Measurement of cytoplasmic calcium concentration in the rods of wild-type and transducin knock-out mice. *J. Physiol.*, 542:843–854, 2002.
- [72] J. Xu, R. L. Dodd, C. L. Makino, M. I. Simon, D. A. Baylor, and J. Chen. Prolonged photoresponses in transgenic mouse rods lacking arrestin. *Nature*, 389:505–509, 1997.
